# Supplementary material for: LINC01123 facilitates proliferation, invasion and chemoresistance of colon cancer cells
Source: PubMed Central journal article supplement (PMC7414518; doi:10.1042/bsr20194062), 2020-08-07
Supplement: BSR-2019-4062_supp.pdf [file BSR-2019-4062_supp.pdf]

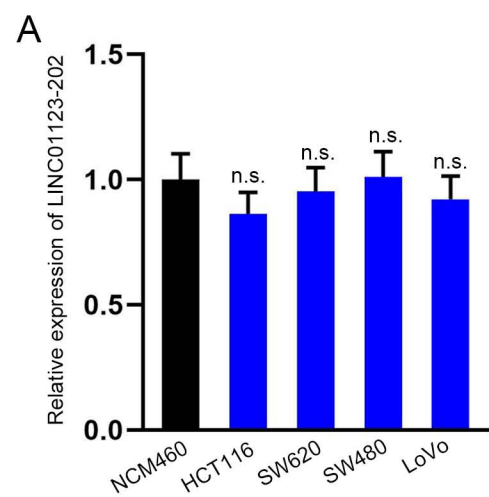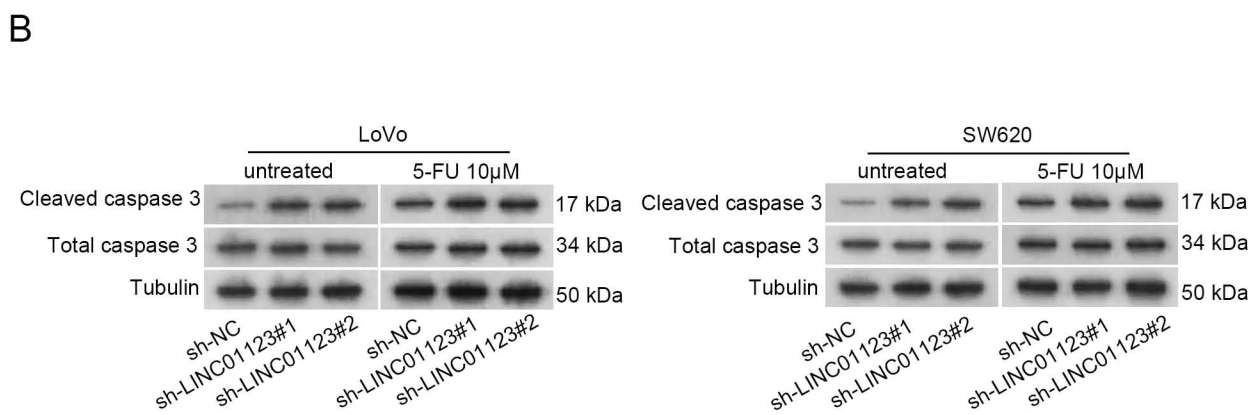

**Figure S1:** (A) qRT-PCR analysis of LINC01123-202 expression in four colon cancer cells and normal cell line NCM460. (B) The protein level of cleaved or total caspase-3 in LoVo and SW620 cells treated with or 5-FU after transfected with sh-NC or LINC01123-specific shRNAs. n.s. indicated data had no statistical significance.

**A**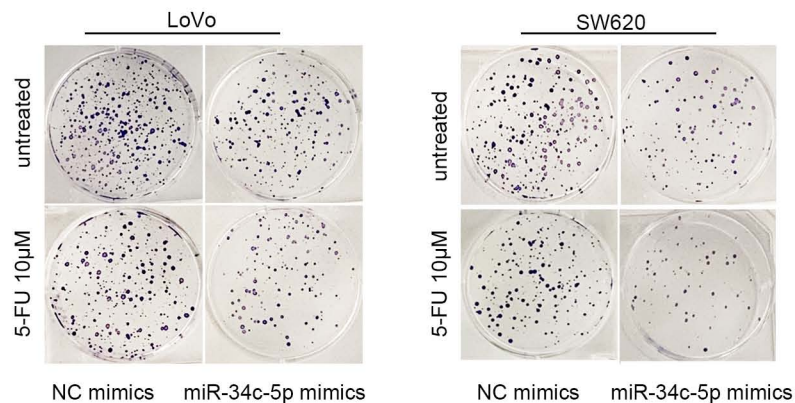**B**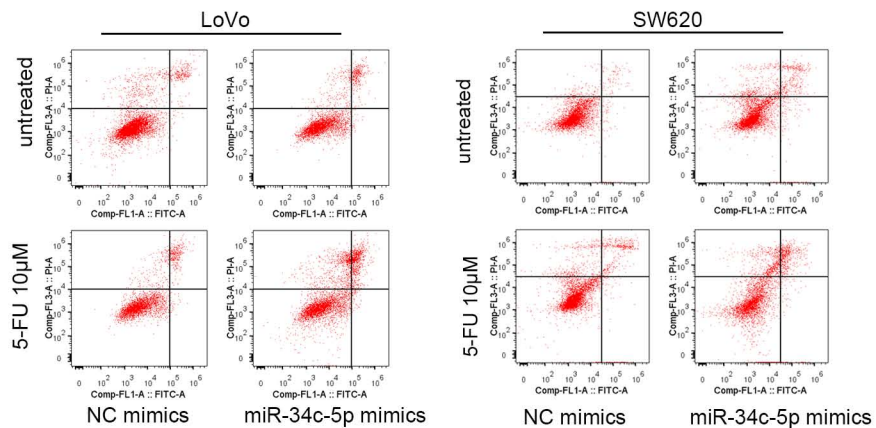**C**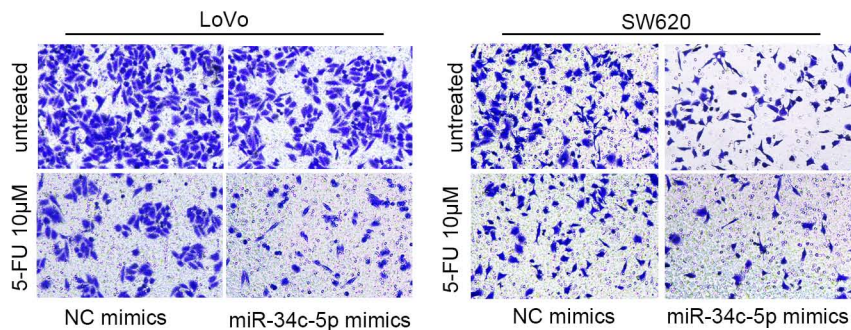**D**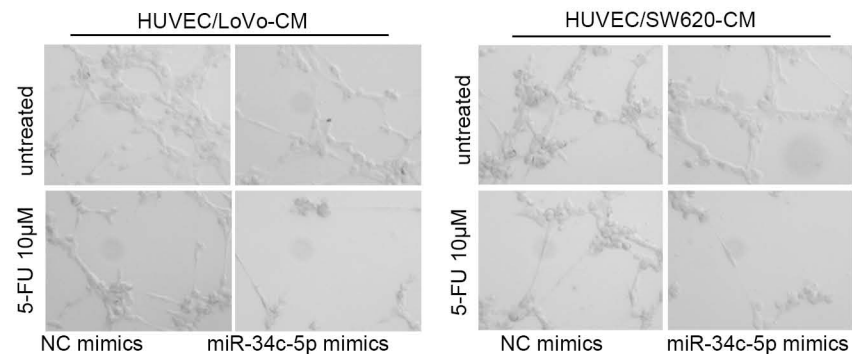

**Figure S2:** (A-D) Experimental images of Figure 2H, I, J, K.

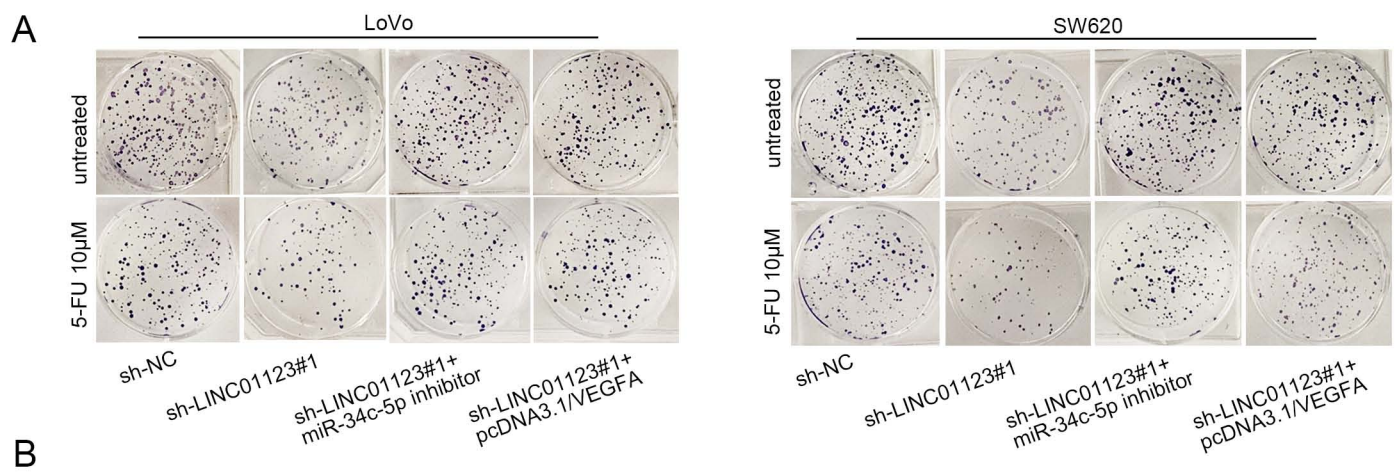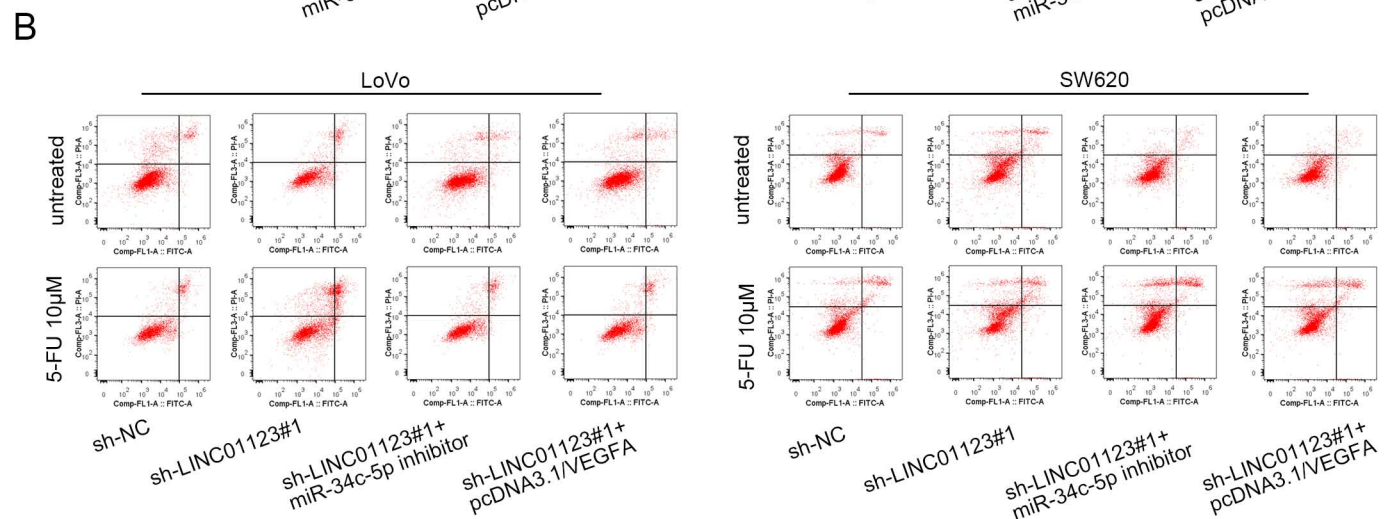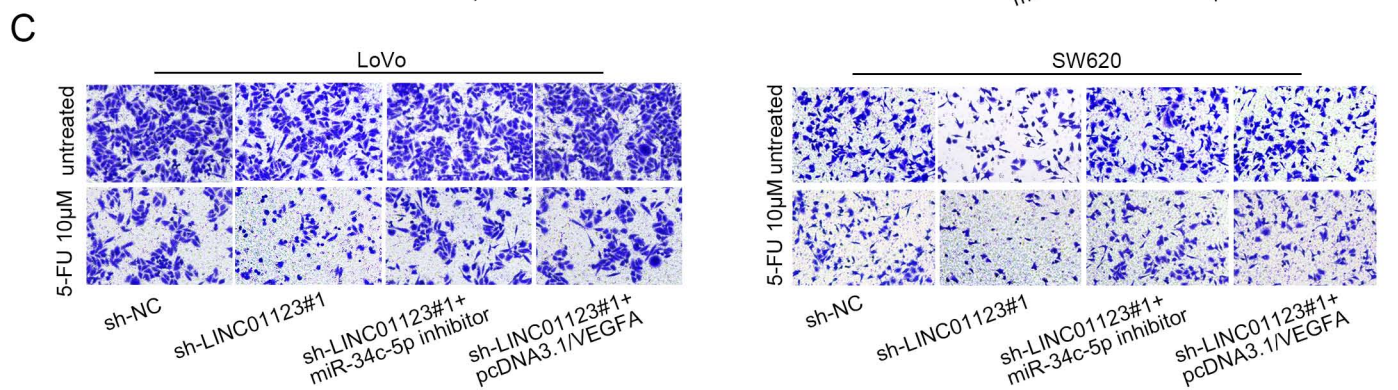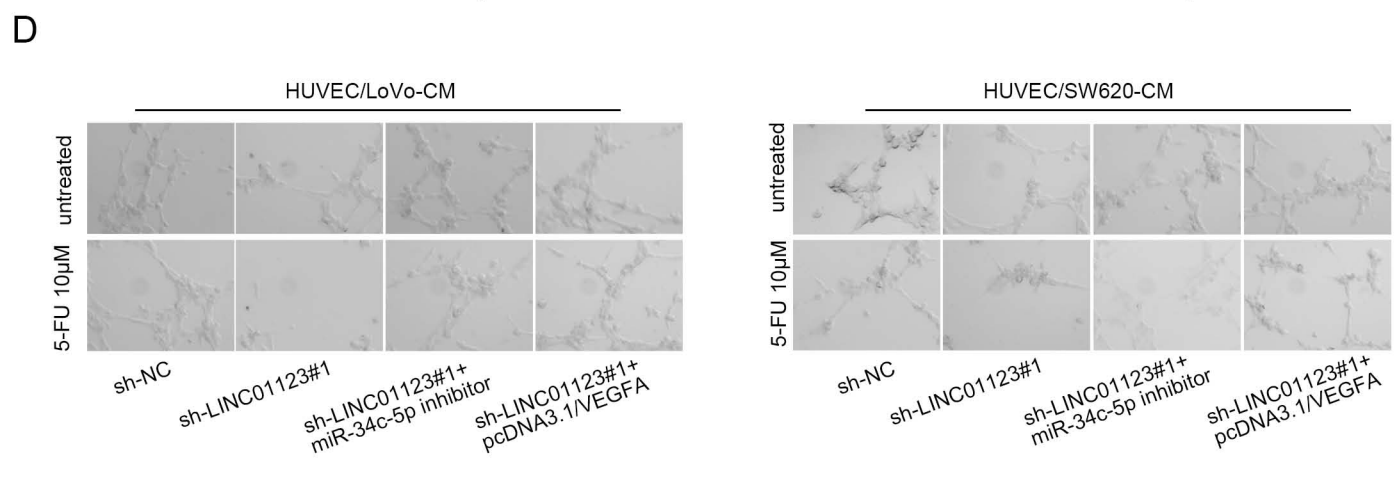

**Figure S3:** (A-D) Experimental images of Figure 4C, D, E, F.
